1 **Comparative performance of four nucleic acid amplification tests for**  
2 **SARS-CoV-2 virus**

3 Yujuan Xiong<sup>1</sup>, Zhen-Zhen Li<sup>2</sup>, Qi-Zhen Zhuang<sup>2</sup>, Yan Chao<sup>1</sup>, Fei Li<sup>3</sup>, Yi-Yuan Ge<sup>3</sup>,  
4 Yi Wang<sup>1</sup>, Pei-Feng Ke<sup>1\*</sup>, Xian-Zhang Huang<sup>1\*</sup>

5

6 <sup>1</sup>Department of Laboratory Medicine, the Second Affiliated Hospital of Guangzhou  
7 University of Chinese Medicine, Guangdong Provincial Key Laboratory of Research  
8 on Emergency in TCM, Guangzhou, 510120, China;

9 <sup>2</sup>Second Clinical Medical College, Guangzhou University of Chinese Medicine,  
10 Guangzhou, 510120, China;

11 <sup>3</sup>Guangdong Human Papillomavirus (HPV) Molecular Diagnostic Engineering  
12 Technology Research Center, Guangdong HybriBio Biotech Co, Ltd, Guangzhou,  
13 510000, China.

14

15 \*Corresponding author: Xian-Zhang, Huang, Pei-Feng Ke; email:  
16 huangxz020@gzucm.edu.cn; Kevinland020@163.com.

17

18

19 **Abstract**

20 Coronavirus disease 2019 (COVID-19) can be screened and diagnosed through the  
21 detection of severe acute respiratory syndrome coronavirus 2 (SARS-CoV-2) by  
22 real-time reverse transcription polymerase chain reaction. SARS-CoV-2 nucleic acid  
23 amplification tests (NAATs) have been rapidly developed and quickly applied to  
24 clinical testing during the pandemic. However, studies evaluating the performance of  
25 these NAAT assays are limited. We evaluated the performance of four NAATs, which  
26 were marked by the Conformité Européenne and widely used in China during the  
27 pandemic. Results showed that the analytical sensitivity of the four assays was  
28 significantly lower than that claimed by the NAAT manufacturers. The limit of  
29 detection (LOD) of Daan, Sansure, and HybriBio NAATs was 3000 copies/mL,  
30 whereas the LOD of Bioperfectus NAATs was 4000 copies/mL. The results of the  
31 consistency test using 46 samples showed that Daan, Sansure, and HybriBio NAATs  
32 could detect the samples with a specificity of 100% (30/30) and a sensitivity of 100%  
33 (16 /16), whereas Bioperfectus NAAT detected the samples with a specificity of 100%  
34 (30/30) and a sensitivity 81.25% (13/16). The sensitivity of Bioperfectus NAAT was  
35 lower than that of the three other NAATs; this finding was consistent with the result  
36 that Bioperfectus NAAT had a higher LOD than the three other kinds of NAATs. The  
37 four above mentioned reagents presented high specificity; however, for the detection  
38 of the samples with low virus concentration, Bioperfectus reagent had the risk of  
39 missing detection. Therefore, the LOD should be considered in the selection of  
40 SARS-CoV-2 NAATs.

41

42 Key words: Severe acute respiratory syndrome coronavirus 2; SARS-CoV-2; nucleic  
43 acid amplification test; performance evaluation; Coronavirus disease 2019;  
44 COVID-19.

45

## 46 **Introduction**

47 Severe acute respiratory syndrome coronavirus 2 (SARS-CoV-2) has spread rapidly  
48 since its recent identification in patients with severe pneumonia in Wuhan, China(1-3).  
49 To date, SARS-CoV-2 has affected more than 372,000 patients worldwide and  
50 resulted in more than 16,000 deaths (as of March 24, 2020)(4). The World Health  
51 Organization (WHO) has declared the Chinese outbreak of coronavirus disease 2019  
52 (COVID-19) to be a Public Health Emergency of International Concern and stated  
53 that the spread of COVID-19 may be interrupted by early detection, isolation, prompt  
54 treatment, and the implementation of a robust system(4, 5). On March 11, at a regular  
55 press conference in Geneva, WHO Director-General Tan Desai said that the  
56 COVID-19 epidemic can be called a pandemic in terms of its characteristics.  
57 Unfortunately, no drug or vaccine has yet been approved to treat human coronaviruses,  
58 and new interventions are likely to require months to years to develop(6). Therefore,  
59 early diagnosis of SARS-CoV-2 infection is important to distinguish it from  
60 asymptomatic, healthy, and other pathogenic infections and to ensure timely isolation  
61 of the infected patients.

62  
63 At present, various detection methods for SARS-CoV-2 infection have been reported,  
64 such as real-time reverse transcription–polymerase chain reaction (RT-PCR) assay,  
65 sequencing, CRISPR technique, nucleic acid mass spectrometry, and serum  
66 immunology(7). However, real-time RT-PCR remains the primary means for  
67 diagnosing COVID-19 among the various diagnostic platforms available. The  
68 development of RT-PCR methods to diagnose COVID-19 mainly targets various  
69 combinations of the open reading frame (ORF), envelope (E), nucleocapsid (N), spike  
70 (S), and RNA-dependent RNA polymerase (RdRp) genes(8-10).

71  
72 Although real-time RT-PCR assay is a highly sensitive technique, false negative  
73 results have still been reported in some COVID-19 patients. These results may occur  
74 due to insufficient organisms in the specimen resulting from improper collection,  
75 transportation, storage, and handling, as well as laboratory test conditions and

76 personnel operation(11-13). Moreover, the quality of the examined reagents is related  
77 closely to the PCR results for SARS-CoV-2. In response to this outbreak, a number of  
78 nucleic acid amplification tests (NAATs) for SARS-CoV-2 were rapidly developed in  
79 China and quickly applied to clinical testing. To date, no quality evaluation of  
80 SARS-CoV-2 NAATs has been reported.

81

82 The purpose of this study was to comprehensively evaluate the performance of four  
83 SARS-CoV-2 NAATs, which were Conformité Européenne (CE) marked and widely  
84 used. The results of this study will be helpful for laboratorians to select the  
85 appropriate assay for detecting SARS-CoV-2.

86

## 87 **Materials and methods**

88 **Tested samples.** The kit of performance verification reference materials, which were  
89 cell cultures containing pseudoviruses, included 10 positive reference materials, two  
90 negative reference materials, 18 analytical specificity reference materials, and three  
91 interference reference materials (Guangzhou BDS Biological Technology Company  
92 Limited).The positive quality control agents were made with cell cultures containing  
93 SARS-CoV-2 pseudoviruses (Guangzhou BDS Biological Technology Company  
94 Limited).The pseudoviruses in the positive quality control agents included segments  
95 of the ORF1ab gene (the genome coordinates: 900–1500,12200–13500, 18770–18950,  
96 and 20560–24453), N gene, and E gene, which were the important characteristic  
97 genes of SARS-CoV-2. RNA transcripts, presented by the Chinese Academy of  
98 Metrology, were used as standard materials. The RNA transcripts obtained the  
99 complete N gene, the complete E gene, and ORF1ab gene segment (14911–15910,  
100 GenBank No. NC\_O45512) of SARS-CoV-2. The standard value of reference  
101 material was obtained by absolute quantitative digital PCR. RNA was extracted from  
102 cell cultures with the nucleic acid extraction reagent (Tianlong Technology Company  
103 Limited), aliquoted into multiple tubes for testing with each NAAT method, and  
104 stored at –80 °C.

105 Human samples (n = 46), which were RNA leftovers from daily laboratory activity,

106 were provided by the Guangdong Provincial Hospital of Chinese Medicine and  
107 HybriBio Medical Laboratory. The selection of clinical samples used in the study was  
108 exclusively based on their SARS-CoV-2 virus detection result. The study was  
109 approved by the Ethics Committees from the Guangdong Provincial Hospital of  
110 Chinese Medicine (ZE2020-027-01).

111

112 **Assay and equipment.** Four sets of systems were used to detect the SARS-CoV-2  
113 virus: Daan SARS-CoV-2 NAAT on LightCycler 480 II PCR instrument (Daan  
114 NAAT), Sansure SARS-CoV-2 NAAT on SLAN-96P PCR instrument (Sansure  
115 NAAT), HybriBio SARS-CoV-2 virus NAAT on SLAN-96P PCR instrument  
116 (HybriBio NAAT), and Bioperfectus SARS-CoV-2 NAAT on SLAN-96P PCR  
117 instrument (Bioperfectus NAAT). Real-time PCR was applied to the four systems,  
118 which targeted the combinations of the ORF1ab gene, N gene of SARS-CoV-2, and  
119 endogenous gene of humans. About 5  $\mu$ L of RNA was added to the PCR mixture and  
120 tested according to the manufacturers' instructions for each assay. Positive results  
121 were defined as the simultaneous detection of the ORF1ab gene and N gene. The four  
122 systems had different detection sites for the ORF1ab gene. The PCR primers designed  
123 for the four systems were complementary to the sites on the SARS-CoV-2 genomic  
124 sequence (GenBank No. NC\_045512) in the region of 20700–21000 (Daan),  
125 12500–13300 (Sansure), 13400–13550 (Bioperfectus), and 7100–7600 bp (HybriBio).  
126 Cycle threshold (Ct) values (i.e., number of cycles required for the fluorescent signal  
127 to cross the threshold in RT-PCR) quantified viral load, with low values indicating a  
128 high viral load.

129

130 **Analytical Sensitivity.** Analytical sensitivity was examined in accordance with a  
131 modified EP17-A protocol, MM03 and MM19-A guidelines of Clinical Laboratory  
132 Standards Institute (CLSI). The analytical sensitivity of each NAAT assay was  
133 compared using the same RNA samples obtained from the extraction of mixed clinical  
134 samples or positive quality controls. The concentrations of RNA samples were  
135 determined by fluorescence quantitative method using standard materials as standard.

136 Serial dilutions were made with a known concentration of the target substance in the  
137 analytical range of the expected limit of detection (LOD) and tested in replicates of 20.  
138 All panel members were prepared at the same time, aliquoted into individual tubes for  
139 each concentration and each assay, stored frozen, and thawed on the day of testing.  
140 When 19 or all 20 replicates were positive, the concentration was temporarily defined  
141 as LOD, followed by 20 replicates per day for two consecutive days, yielding a total  
142 of 60 results. If more than 95% of the results were positive, the concentration was  
143 finally determined as the LOD of the reagent. The experiments were spread over 3  
144 days so that the standard deviations reflect the performance of the assay over a range  
145 of typical laboratory conditions but without a change in reagent lots.

146

147 **Precision.** Precision was evaluated in accordance with a modified EP12 protocol,  
148 MM09 and MM19-A guideline of CLSI using a patient RNA pool with concentration  
149 above 20% of the LOD and the negative sample. Sample pools were divided into five  
150 aliquots per level and frozen at  $-70^{\circ}\text{C}$ . One aliquot of each level was thawed daily  
151 and analyzed four times per day during a period of five consecutive workdays ( $n = 20$   
152 per level). Precision was evaluated as the coefficient of variation (CV), which was  
153 calculated from the data series mean and standard deviation.

154

155 **Accuracy.** Ten positive reference materials and two negative reference materials from  
156 the performance verification reference material kit were used to evaluate accuracy.

157

158 **Analytical specificity.** Eighteen pseudovirus samples of analytical specificity  
159 reference materials from the performance verification reference material kit were used  
160 to determine the analytical specificity of four NAATs, including human coronavirus  
161 HCoV-OC43, HCoV-HKU1 RNA, HCoV-229E RNA, HCoV-NL63 RNA, SARS  
162 RNA, Middle East respiratory syndrome (MERS) RNA, influenza A H1N1 virus,  
163 influenza B INFB virus, respiratory syncytial virus type A and type B, human  
164 parainfluenza virus, adenovirus, enterovirus, mycoplasma pneumoniae, Epstein–Barr  
165 (EB) virus, human cytomegalovirus, *Mycobacterium tuberculosis*, and two samples

166 with human genome DNA.

167

168 **Analytical interferences.** To investigate the analytical interferences, three  
169 interference reference materials from the performance verification reference material  
170 kit were used, including 6 g/dL hemoglobin, 30 g/dL albumin, and the mix of 100  
171  $\mu\text{g/mL}$  ribavirin and 100  $\mu\text{g/mL}$  azithromycin. All tests were repeated three times.

172

173 **Method comparison.** Forty-six RNA samples from suspected patients with  
174 COVID-19 were used in the method comparison. Given that no reference method was  
175 used to determine the sensitivity and specificity of NAATs, the consensus result was  
176 determined for each sample; samples were categorized as true positive (TP) if positive  
177 by two or more assays (14). The SARS-CoV-2-positive samples were further  
178 confirmed by sequencing.

179

180 **Statistical analysis.** The significance of the difference in sensitivity between the  
181 NAATs was assessed by using Fisher's exact test in GraphPad Prism (5.0). The  
182 Chi-square likelihood ratio test was used to analyze the discordant results. The 95%  
183 confidence intervals (CIs) for specificity and sensitivity were calculated by using the  
184 Wilson–Score method in GraphPad Prism. Significant differences were considered at  
185  $P$  values less than 0.05.

186

187 Result

188 **Analytical sensitivity.** We evaluated the analytical sensitivity of each assay to  
189 determine differences in the ability of each assay to detect SARS-CoV-2 in mixed  
190 clinical samples or in pseudovirus cultures. First, we contrived RNA specimens from  
191 SARS-CoV-2 pseudovirus cultures at four separate final concentrations (500, 1000,  
192 2000, and 3000 copies/mL). The ORF1ab gene test results of the serial dilutions were  
193 all negative by the HybriBio and the Bioperfectus NAATs. Further investigation  
194 revealed that the pseudoviral RNA did not contain the detecting locus of HybriBio and  
195 Bioperfectus NAATs targeting the ORF1ab gene. Daan NAAT detected 18/20

196 replicates at 2000 copies/mL and 20/20 replicates at 3000 copies/mL. Sansure NAAT  
197 detected 17/20 at 1000 copies/mL and 20/20 at 2000 copies/mL (Table 1). The final  
198 results of 60 replicates showed that the LOD of Daan NAAT was 3000 copies/mL for  
199 pseudovirus cultures, and the LOD of Sansure NAAT was 2000 copies/mL for  
200 pseudovirus cultures.

201

202 To explore the LOD of the NAATs in clinical samples, we further contrived mixed  
203 RNA specimens from clinical samples at three separate final concentrations (2000,  
204 3000, and 4000 copies/mL). Daan NAAT detected 12/20 replicates at 2000 copies/mL  
205 and 20/20 replicates at 3000 copies/mL (Table 1). Sansure NAAT detected 17/20 at  
206 2000 copies/mL and 20/20 at 3000 copies/mL. HybriBio NAAT detected 10/20  
207 replicates at 2000 copies/mL and 20/20 replicates at 3000 copies/mL. Bioperfectus  
208 NAAT detected 10/20 at 3000 copies/mL and 20/20 at 4000 copies/mL. The final  
209 results of 60 replicates showed that the LOD of clinical samples was 3000 copies/mL  
210 by Daan, Sansure, and HybriBio NAATs, whereas that of clinical samples was 4000  
211 copies/mL by Bioperfectus NAAT. The LODs declared in the instructions of Daan,  
212 Sansure, HybriBio, and Bioperfectus NAATs were 500, 200, 1000, and 1000  
213 copies/mL, respectively.

214

215 **Precision.** For the negative sample, the 20 repeated test results by all four NAATs had  
216 no amplification curve of target genes but a positive amplification curve of the  
217 internal reference gene. For the positive sample, 20 repeated test results by all four  
218 NAATs had positive amplification curves of the target genes and internal reference  
219 gene. The within-run CVs at the concentrations above the 20% level of the LOD on  
220 all four systems were less than 4%, and the total CVs were less than 5% (Table 2).

221

222 **Accuracy.** The results of all four NAATs for accuracy evaluation were in line with  
223 expectations by using 10 positive reference materials and two negative reference  
224 materials.

225



226 **Analytical specificity.** For the four assays, no amplification curves were obtained for  
227 up to 10,000 copies/mL of six coronavirus pseudovirus samples with HCoV-OC43,  
228 HCoV-HKU1, HCoV-229E, HCoV-NL63, SARS, and MERS RNA. For the 10  
229 common respiratory pathogens and two human genomic DNA samples, all results of  
230 the four assays were also negative.

231

232 **Analytical interferences.** An assessment of interferences is shown in Table 3. The  
233 bias of Ct value for the N gene and ORF1ab gene on all four systems was less than  
234 8.5% at the following interfering substance concentrations tested: 6 g/dL hemoglobin,  
235 30 g/dL albumin, 100 µg/mL ribavirin, and 100 µg/mL azithromycin.

236

237 **Comparison of the four NAATs.** We defined consistency as two or more tests that  
238 produce same results and used these results to define true positives and negatives. By  
239 this definition, 34.8% (16/30) tested positive and 65.2% (30/46) tested negative. The  
240 results for all four NAATs were negative for all 30 negative samples, and the 16  
241 positive samples were reported positive by Daan, Sansure, and HybriBio NAATs.  
242 However, three of the 16 positive samples were reported negative by Bioperfectus  
243 NAAT (Table 4). The Ct values of the N gene and ORF1ab gene in the three positive  
244 samples by Daan, Sansure, and HybriBio NAATs are shown in Table 5, and the Ct  
245 values of the ORF1ab gene were close to the positive threshold of the three NAATs  
246 declared in their instructions.

247

248 The sensitivity and specificity for each NAAT were calculated based on consistent  
249 analysis. For Daan, Sansure, and HybriBio NAATs, their specificity and sensitivity  
250 were 100%. For Bioperfectus NAAT, the sensitivity was 81.25% and specificity was  
251 100%. No significant difference was found in the sensitivity between Bioperfectus  
252 NAAT and the three other NAATs ( $P > 0.05$ ).

253

## 254 **Discussion**

255 The prevention of the COVID-19 epidemic is very grim. On the basis of China's

256 experience in preventing the further spread of the disease in the past 2 months,  
257 identifying COVID-19 from patients with other diseases as soon as possible has been  
258 proven to be particularly important to execute early isolation and early treatment (4, 5,  
259 15). The use of RT-PCR technology to detect SARS-CoV-2 nucleic acid is an  
260 effective means to screen SARS-CoV-2 virus-infected patients. The current  
261 SARS-CoV-2 NAATs, which are widely used in China, were developed in response to  
262 the emergency situation of screening for SARS-CoV-2 infection. The performance of  
263 the assays is exactly what all testers want to know. In this study, four NAATs were  
264 evaluated. The results showed that the LODs of the four assays were significantly  
265 higher than the LODs declared in their instructions, suggesting that each laboratory  
266 should re-evaluate the LOD of the reagents depending on the needs of their laboratory.  
267 The RNA detection data from pseudovirus cultures showed that the LOD of Sansure  
268 was slightly lower than that of Daan NAAT. The RNA detection data from clinical  
269 samples showed that the LOD of Bioperfectus NAAT was slightly higher than that of  
270 the three other reagents but still reached the detection sensitivity of 20 copies per PCR  
271 reaction. There was no significant difference in the LOD of SARS-CoV-2 virus  
272 between pseudovirus cultures and clinical samples for Daan and Sansure NAATs.  
273 Thus, pseudovirus cultures could be used as an alternative for clinical samples in the  
274 performance evaluation of LOD. In addition, the four assays showed high precision,  
275 and the CV value was less than 5% when the concentration was 20% higher than the  
276 LOD. There were no cross-reactions by the four assays with four common human  
277 coronaviruses, SARS, and MERS viruses and no cross-reaction with other common  
278 respiratory pathogens, such as respiratory syncytial virus, adenovirus, influenza virus,  
279 and *Mycoplasma pneumoniae*.

280

281 In the present study, we further compared four NAATs for the detection of  
282 SARS-CoV-2 in clinical samples from suspected COVID-19 patients. Results showed  
283 that the clinical sensitivity and specificity of Daan, Sansure, and HybriBio NAATs  
284 were 100%, while three of the positive samples were missed by Bioperfectus NAAT.  
285 The Ct values of the ORF1ab gene of the three samples tested with Daan, Sansure,

286 and HybriBio reagents were all close to 40, indicating that the concentration of the  
287 three samples may be lower than the LOD of Bioperfectus. Therefore, the LOD  
288 should be included in the reference index when selecting reagents for SARS-CoV-2 in  
289 the laboratory. Sequencing verification of the PCR-positive samples in this study  
290 suggested that the four assays did not show false positives in the detection of limited  
291 clinical samples. Although the small clinical sample size limited the optimal  
292 evaluation of the performance of these assays, the results of this study can still help  
293 laboratories to select an appropriate SARS-CoV-2 NAAT supplier and interpret their  
294 detection results.

295

296 Obtaining high-quality viral RNA from original clinical samples is crucial to ensure  
297 the accuracy of the detection results by NAATs. Therefore, the poor quality of  
298 extraction reagents and the unoptimized extraction process of viral RNA would affect  
299 the detection results. In this study, the performance of NAATs was evaluated by using  
300 the same viral RNA samples. Therefore, the difference in the experimental results  
301 only reflected the difference in the performance of nucleic acid amplification for  
302 NAATs but not the diversity in the performance of the whole SARS-CoV-2 detection  
303 system, which usually includes the nucleic acid extraction system.

304

305 In addition, RNA viruses may show substantial genetic variability. This could result in  
306 mismatch between the primer and probes with the target sequence, which can  
307 diminish the assay performance or result in false negative results. Therefore, the  
308 manufacturer of NAATs should pay attention to the sequence update information of  
309 the virus database at any time to ensure no mutation exists in the genome sequences  
310 corresponding to the primers, especially for the sequences corresponding to the 3' end  
311 of the primers.

312

313 In summary, the four SARS-CoV-2 NAATs commonly used with commercial assays  
314 showed good reliability, but the actual LOD was significantly higher than the declared  
315 LOD. The analytic sensitivity of Daan, Sansure, and HybriBio NAATs was slightly

316 higher than that of Bioperfectus NAAT.

317

318 Acknowledgments

319 The authors would like to thank the Chinese Academy of Metrology, Sansure,

320 Bioperfectus, and HybriBio for supplying the test kits.

321

322

## 323 References

- 324 1. Zhu N, Zhang D, Wang W, Li X, Yang B, Song J, Zhao X, Huang B, Shi W, Lu R, Niu P, Zhan F, Ma  
325 X, Wang D, Xu W, Wu G, Gao GF, Tan W, China Novel Coronavirus I, Research T. 2020. A Novel  
326 Coronavirus from Patients with Pneumonia in China, 2019. *N Engl J Med* 382:727-733.
- 327 2. Wang C, Horby PW, Hayden FG, Gao GF. 2020. A novel coronavirus outbreak of global health  
328 concern. *Lancet* 395:470-473.
- 329 3. Li Q, Guan X, Wu P, Wang X, Zhou L, Tong Y, Ren R, Leung KSM, Lau EHY, Wong JY, Xing X,  
330 Xiang N, Wu Y, Li C, Chen Q, Li D, Liu T, Zhao J, Li M, Tu W, Chen C, Jin L, Yang R, Wang Q, Zhou  
331 S, Wang R, Liu H, Luo Y, Liu Y, Shao G, Li H, Tao Z, Yang Y, Deng Z, Liu B, Ma Z, Zhang Y, Shi G,  
332 Lam TTY, Wu JTK, Gao GF, Cowling BJ, Yang B, Leung GM, Feng Z. 2020. Early Transmission  
333 Dynamics in Wuhan, China, of Novel Coronavirus-Infected Pneumonia. *N Engl J Med*  
334 doi:10.1056/NEJMoa2001316.
- 335 4. World Health Organization (2020). Novel Coronavirus(2019-nCoV): Situation Report..
- 336 5. World Health Organization(2020). Clinical management of severe acute respiratory infection  
337 when novel coronavirus (2019-nCoV) infection is suspected: interim guidance (2020-01-28).
- 338 6. Li G, De Clercq E. 2020. Therapeutic options for the 2019 novel coronavirus (2019-nCoV). *Nat*  
339 *Rev Drug Discov* 19:149-150.
- 340 7. Pang J, Wang MX, Ang IYH, Tan SHX, Lewis RF, Chen JI, Gutierrez RA, Gwee SXW, Chua PEY,  
341 Yang Q, Ng XY, Yap RK, Tan HY, Teo YY, Tan CC, Cook AR, Yap JC, Hsu LY. 2020. Potential Rapid  
342 Diagnostics, Vaccine and Therapeutics for 2019 Novel Coronavirus (2019-nCoV): A Systematic  
343 Review. *J Clin Med* 9.
- 344 8. Binnicker MJ. 2020. Emergence of a Novel Coronavirus Disease (COVID-19) and the  
345 Importance of Diagnostic Testing: Why Partnership between Clinical Laboratories, Public  
346 Health Agencies, and Industry Is Essential to Control the Outbreak. *Clin Chem*  
347 doi:10.1093/clinchem/hvaa071.
- 348 9. Chu DKW, Pan Y, Cheng SMS, Hui KPY, Krishnan P, Liu Y, Ng DYM, Wan CKC, Yang P, Wang Q,  
349 Peiris M, Poon LLM. 2020. Molecular Diagnosis of a Novel Coronavirus (2019-nCoV) Causing  
350 an Outbreak of Pneumonia. *Clin Chem* doi:10.1093/clinchem/hvaa029.
- 351 10. Chan JF, Yip CC, To KK, Tang TH, Wong SC, Leung KH, Fung AY, Ng AC, Zou Z, Tsoi HW, Choi GK,  
352 Tam AR, Cheng VC, Chan KH, Tsang OT, Yuen KY. 2020. Improved molecular diagnosis of  
353 COVID-19 by the novel, highly sensitive and specific COVID-19-RdRp/Hel real-time reverse  
354 transcription-polymerase chain reaction assay validated in vitro and with clinical specimens. *J*  
355 *Clin Microbiol* doi:10.1128/JCM.00310-20.
- 356 11. Han Y, Yang H. 2020. The transmission and diagnosis of 2019 novel coronavirus infection  
357 disease (COVID-19): A Chinese perspective. *J Med Virol* doi:10.1002/jmv.25749.
- 358 12. Zou L, Ruan F, Huang M, Liang L, Huang H, Hong Z, Yu J, Kang M, Song Y, Xia J, Guo Q, Song T,  
359 He J, Yen HL, Peiris M, Wu J. 2020. SARS-CoV-2 Viral Load in Upper Respiratory Specimens of  
360 Infected Patients. *N Engl J Med* 382:1177-1179.
- 361 13. Xie C, Jiang L, Huang G, Pu H, Gong B, Lin H, Ma S, Chen X, Long B, Si G, Yu H, Jiang L, Yang X,  
362 Shi Y, Yang Z. 2020. Comparison of different samples for 2019 novel coronavirus detection by  
363 nucleic acid amplification tests. *Int J Infect Dis* 93:264-267.
- 364 14. Miller SA, Deak E, Humphries R. 2015. Comparison of the AmpliVue, BD Max System, and  
365 illumigene Molecular Assays for Detection of Group B Streptococcus in Antenatal Screening  
366 Specimens. *J Clin Microbiol* 53:1938-41.

- 367 15. National Health Commission. The guidelines for the diagnosis and treatment of severe acute  
368 respiratory syndrome coronavirus 2(SARS-CoV-2)infection (Pilot 7rd version).  
369 [http://www.nhc.gov.cn/yzygj/s7653p/202003/46c9294a7dfe4cef80dc7f5912eb1989/files/ce](http://www.nhc.gov.cn/yzygj/s7653p/202003/46c9294a7dfe4cef80dc7f5912eb1989/files/ce3e6945832a438eaae415350a8ce964.pdf)  
370 [3e6945832a438eaae415350a8ce964.pdf](http://www.nhc.gov.cn/yzygj/s7653p/202003/46c9294a7dfe4cef80dc7f5912eb1989/files/ce3e6945832a438eaae415350a8ce964.pdf) .  
371

372

373 **Table 1.** Comparison of Analytical sensitivity.

| Copies/mL   | Pseudoviruses |         |          |              | Clinical samples |         |          |              |
|-------------|---------------|---------|----------|--------------|------------------|---------|----------|--------------|
|             | Daan          | Sansure | HybriBio | Bioperfectus | Daan             | Sansure | HybriBio | Bioperfectus |
| <b>4000</b> | /             | /       | /        | /            | 20/20            | 20/20   | 20/20    | 20/20        |
| <b>3000</b> | 20/20         | 20/20   | 0/20     | 0/20         | 20/20            | 20/20   | 20/20    | 12/20        |
| <b>2000</b> | 18/20         | 20/20   | 0/20     | 0/20         | 12/20            | 17/20   | 17/20    | 5/20         |
| <b>1000</b> | 12/20         | 17/20   | 0/20     | 0/20         | /                | /       | /        | /            |
| <b>500</b>  | 5/20          | 17/20   | 0/20     | 0/20         | /                | /       | /        | /            |

374

375 **Table 2.** Comparison of precision.

|                     | N gene   |        |            |              | ORF1ab gene |        |            |              |
|---------------------|----------|--------|------------|--------------|-------------|--------|------------|--------------|
|                     | Standard | CV (%) | Within-run | CV Total (%) | Standard    | CV (%) | Within-run | CV Total (%) |
| <b>Daan</b>         | 39.87    | 0.54   |            | 0.64         | 37.22       | 1.60   |            | 4.18         |
| <b>Sansure</b>      | 36.20    | 2.40   |            | 2.41         | 38.41       | 3.12   |            | 3.55         |
| <b>HybriBio</b>     | 35.27    | 1.71   |            | 1.95         | 37.03       | 2.79   |            | 2.96         |
| <b>Bioperfectus</b> | 33.90    | 3.16   |            | 3.24         | 33.33       | 2.25   |            | 3.59         |

376

377 **Table 3.** Sample interferences for common interferents.

| Interferent                         | Relative bias from native sample, Ct% |        |         |        |          |        |              |        |
|-------------------------------------|---------------------------------------|--------|---------|--------|----------|--------|--------------|--------|
|                                     | Daan                                  |        | Sansure |        | HybriBio |        | Bioperfectus |        |
|                                     | N                                     | ORF1ab | N       | ORF1ab | N        | ORF1ab | N            | ORF1ab |
| <b>Hemoglobin</b>                   | 7.29                                  | 5.96   | 6.06    | 2.84   | 7.45     | 7.00   | 7.20         | 4.15   |
| <b>Albumin</b>                      | 6.72                                  | 5.92   | 6.83    | 3.39   | 8.22     | 7.96   | 7.20         | 3.72   |
| <b>Ribavirin &amp; Azithromycin</b> | 6.72                                  | 5.92   | 6.76    | 4.54   | 7.86     | 7.60   | 7.20         | 4.23   |

378

379 **Table 4.** Comparison of NAATs to consensus results for detection of SARS-CoV-2.

| Assays              | TP | TN | FP | FN | Sensitivity (95% CI)  | Specificity (95% CI) |
|---------------------|----|----|----|----|-----------------------|----------------------|
| <b>Daan</b>         | 16 | 30 | 0  | 0  | 100%(80.64 - 100)     | 100%(80.64 - 100)    |
| <b>Sansure</b>      | 16 | 30 | 0  | 0  | 100%(80.64 - 100)     | 100%(80.64 - 100)    |
| <b>HybriBio</b>     | 16 | 30 | 0  | 0  | 100%(80.64 - 100)     | 100%(80.64 - 100)    |
| <b>Bioperfectus</b> | 13 | 30 | 0  | 3  | 81.25%(56.99 - 93.41) | 100%(88.65 - 100)    |

380

381 **Table 5.** Ct values of the three clinical samples which was SARS-CoA-2 negative detected by  
382 Bioperfectus NAATs.

| Samples   | Daan  |         | Sansure |         | HybriBio |         |
|-----------|-------|---------|---------|---------|----------|---------|
|           | N     | ORF 1ab | N       | ORF 1ab | N        | ORF 1ab |
| <b>S1</b> | 34.57 | 38.09   | 37.22   | 38.48   | 36.27    | 38.51   |
| <b>S2</b> | 35.45 | 40      | 37.09   | 40      | 37.96    | 39.69   |
| <b>S3</b> | 35.83 | 40      | 36.16   | 39.97   | 36.24    | 37.42   |

383
